# Supplementary material for: Dielectric property and energy storage performance enhancement for iron niobium based tungsten bronze ceramic
Source: Royal Society of Chemistry journal article supplement (doi:10.1039/d2ra05403e), 2022-01-01
Supplement: d2ra05403e1.pdf [file d2ra05403e1.pdf]

## Dielectric property and energy storage performance enhancement for iron niobium based tungsten bronze ceramic

Wenbin Feng\*, Lilin Cheng, Xiu-Ni Hua, Xin Chen, Hui Zhang and Haibao Duan

### Supplementary Information:

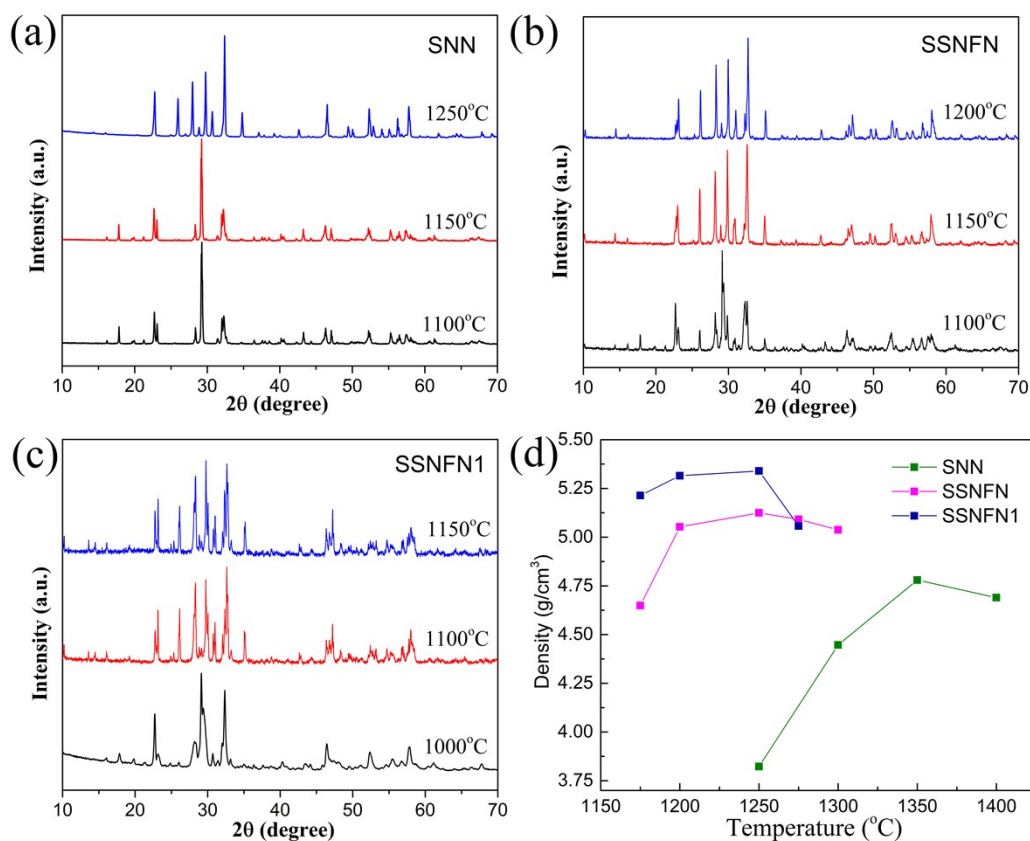

**Fig. S1.** XRD pattern of the powders calcined at different temperatures: (a) SNN, (b) SSNFN, (c) SSNFN1; (d) densities of the ceramics with increasing sintering temperature for SNN, SSNFN and SSNFN1.

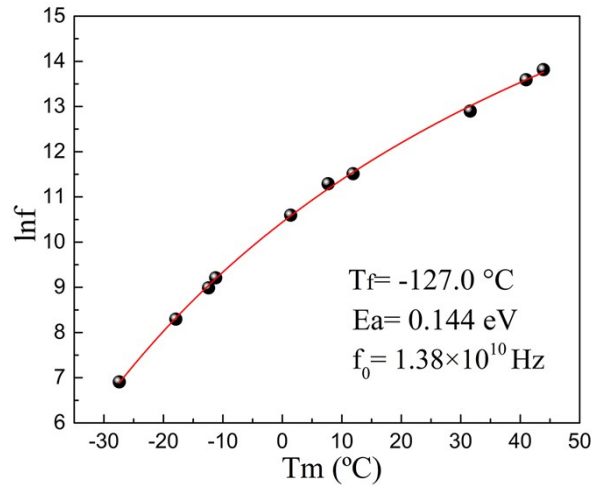

**Fig. S2.** The VF fitting curve of SSNFN which reveals the relationship between the dielectric permittivity peak temperature  $T_m$  and the corresponding frequency  $f$ .

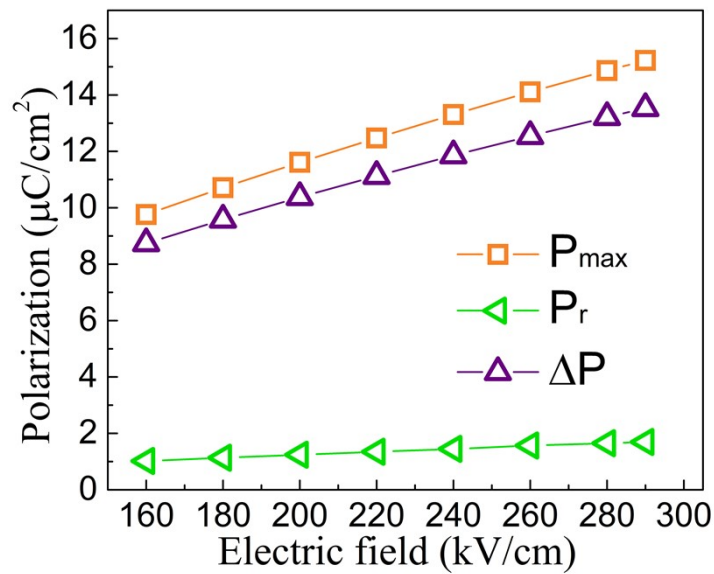

**Fig. S3.** The change of  $P_{max}$ ,  $P_r$  and  $\Delta P$  with increasing electric field, obtained from the variation of unipolar  $P$ - $E$  loops with increasing imposed electric field at ambient temperature(Fig. 7(a)).

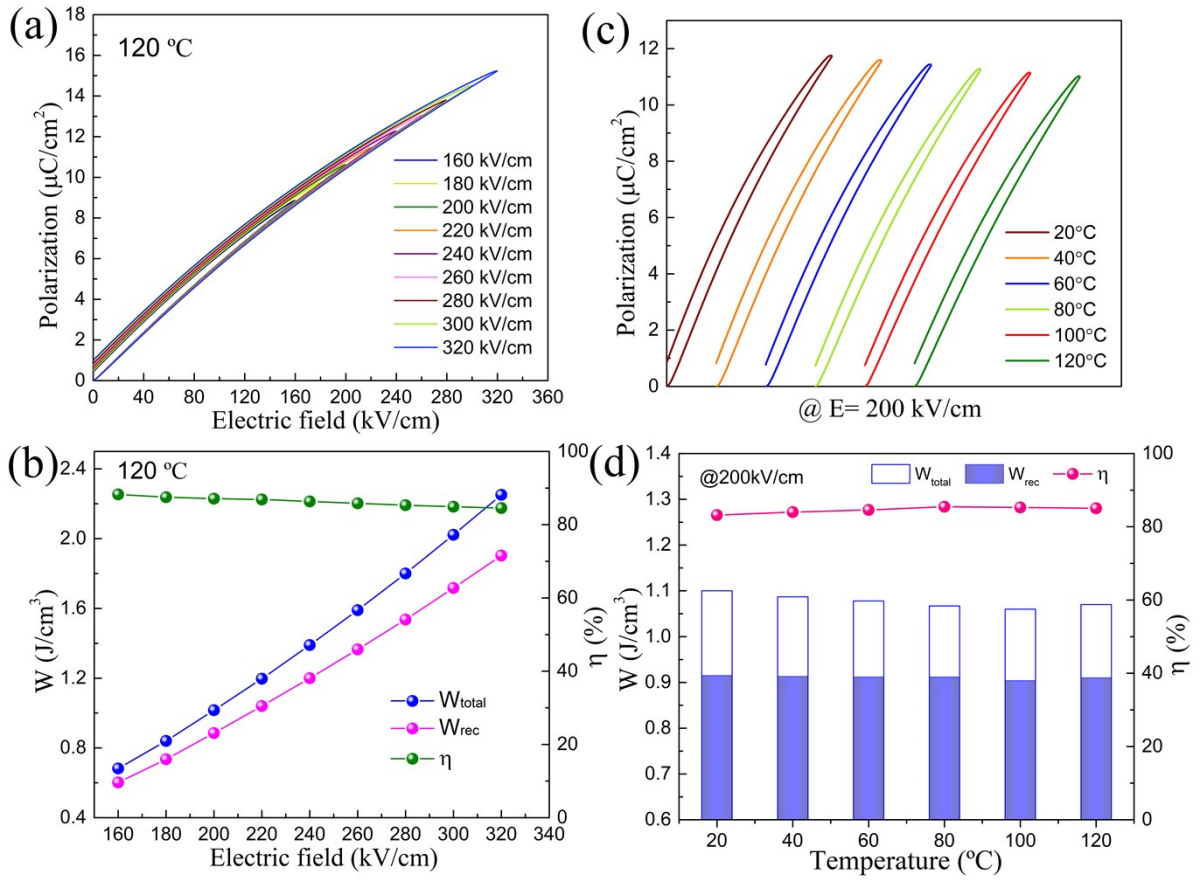

**Fig. S4.** Energy storage performances of the SSNFN ceramic: (a) the variation of unipolar  $P$ - $E$  loops with increasing imposed electric field at  $120^\circ\text{C}$ ; (b) the calculated total energy storage density ( $W_{\text{total}}$ ), recoverable energy storage density ( $W_{\text{rec}}$ ) and energy storage efficiency ( $\eta$ ) under different electric fields at  $120^\circ\text{C}$ ; (c) the temperature dependence of unipolar  $P$ - $E$  loops from  $20$  to  $120^\circ\text{C}$  under the electric field of  $200$  kV/cm; (d) the calculated  $W_{\text{total}}$ ,  $W_{\text{rec}}$  and  $\eta$  under  $200$  kV/cm at different temperatures.
